# Supplementary material for: E-Cigarette Aerosol Deposition and Disposition of [11C]Nicotine Using Positron Emission Tomography: A Comparison of Nicotine Uptake in Lungs and Brain Using Two Different Nicotine Formulations
Source: Pharmaceuticals (Basel). 2022 Mar 17;15(3):367. doi: 10.3390/ph15030367 (PMC8950566; doi:10.3390/ph15030367)
Supplement: Supplementary file 1 [file pharmaceuticals-15-00367-s001.zip › pharmaceuticals-1589787-supplementary.pdf]

## Supplemental information

### Detailed descriptions of VOI

#### **Mouth regions**

Generally, four VOIs were delineated for the mouth scans. In four cases also the lower brain was delineated. For some delineation details, see below.

##### **Oral cavity (including pharynx)**

- Delineation on the summation PET-image guided by [<sup>11</sup>C]nicotine uptake and for anatomy using ULDCT
- Delineated from the top of the oral cavity down to the slice comprising the mid corniculate cartilage.
- Mean volume  $\pm$  SD:  $67.5 \pm 17.5$

##### **Trachea mouth**

- Delineation on the ULDCT image-guided anatomy and adjusted for [<sup>11</sup>C]nicotine uptake using the PET summation image.
- Trachea was delineated from the level of vocal cords and downwards.
- The size of VOIs was enlarged to cover the uptake in the tracheal walls, and adjusted to match the PET-uptake
- Mean volume  $\pm$  SD:  $26.1 \pm 4.7$

##### **Oesophagus mouth**

- Delineation on the PET summation image guided by [<sup>11</sup>C]nicotine uptake and adjusted for anatomy using ULDCT
- Delineated in all the image planes covering esophagus using fixed-size circles (1.2 cm in diameter)
- The fixed circle was not appropriate for delineation in all image slices; freehand VOIs were used in those slices.
- Mean volume  $\pm$  SD:  $8.4 \pm 1.2$

##### **Upper lung**

- Delineation on the ULDCT image, guided by anatomy
- Delineated from top of the lung and downwards, as far as lung was present in the field of view. Mean volume  $\pm$  SD:  $365.9 \pm 128.5$

##### **Lower brain**

- Delineation on the ULDCT image, guided by anatomy

- The lower brain VOI was outlined in each consecutive slice where the brain was present.
- The lower brain was delineated for two freebase and lactate scans
- Mean volume  $\pm$  SD:  $641 \pm 159.7$

## **Lung regions**

Five VOIs were delineated for the lung scans. For some delineation details, see below.

### **Lung**

- Delineation on the ULDCT image, guided by anatomy
- Outlined from top of the lung and downwards
- The most inferior level of the lungs, close to the diaphragm, was not outlined as substantial movements occurred due to breathing.
- Both lungs were merged to one VOI
- Mean volume  $\pm$  SD:  $3050 \pm 624.9$

### **Deep lung**

- Delineation on the ULDCT image, guided by anatomy
- Delineated from top of the right lung and downwards. Fixed-size spheres (1.5 cm in diameter) were delineated in peripheral lung tissue, i.e., tissue free from significant blood vessels and bronchi as far as possible.
- The spheres were placed at every 10<sup>th</sup> slice (center-to-center). The first sphere was placed on a slice 5 slices below top of the lung. The last sphere was placed on a level without spillover from liver uptake.
- Mean volume  $\pm$  SD:  $10.6 \pm 1.1$

### **Trachea lung**

- Delineation on the ULDCT image, guided by anatomy, and adjusted for [<sup>11</sup>C]nicotine uptake
- Delineated from top of CT image and downwards to a slice 7-8 slices above the bifurcation of trachea.
- The size of VOIs was enlarged to cover the uptake in the tracheal walls, and adjusted to match the PET-uptake
- Mean volume  $\pm$  SD:  $32.6 \pm 9.0$

### **Primary-secondary bronchi**

- Delineation on the PET summation image-guided by [<sup>11</sup>C]nicotine uptake and adjusted for anatomy
- Outlined from 7-8 slices above the trachea's bifurcation and downwards beyond the second but not beyond the third bifurcation.
- The primary and secondary bronchi were delineated in each slice as far as PET uptake was noticed.
- Mean volume  $\pm$  SD: 52.5  $\pm$  16.7

#### **Oesophagus lung**

- Delineation on the PET summation image-guided by [<sup>11</sup>C]nicotine uptake and adjusted for anatomy
- Delineated in all the image planes covering esophagus Fixed-size circles (1.2 cm in diameter) were delineated; if not appropriate freehand VOIs were delineated.
- Mean volume  $\pm$  SD: 24.9  $\pm$  2.0

For some subjects, the [<sup>11</sup>C]nicotine uptake was not distinguishable for all image planes in primary-secondary bronchi and oesophagus. Only the parts of the region with distinguishable uptake were delineated.

**Supplemental Table S1 VOI volumes in ml**

| Mouth scan                   | Oral_cavity                   | Trachea <i>mouth</i> | Oesophagus <i>mouth</i> | Upper lung              | Lower_brain      | Formulation |
|------------------------------|-------------------------------|----------------------|-------------------------|-------------------------|------------------|-------------|
| S0001                        | no scan                       | no scan              | no scan                 | no scan                 | no scan          | Freebase    |
| S0002                        | 60                            | 28                   | 7                       | 127                     | -                | Freebase    |
| S0006                        | 56                            | 26                   | 10                      | 418                     | 474 <sup>a</sup> | Freebase    |
| S0009                        | 115                           | 23                   | 7                       | 167                     | -                | Freebase    |
| S0012                        | 67                            | 32                   | 9                       | 482                     | 514 <sup>a</sup> | Freebase    |
| S0027                        | 76                            | 30                   | 9                       | 493                     | -                | Freebase    |
| S0013                        | 63                            | 30                   | 8                       | 502                     | -                | Lactate     |
| S0015                        | 63                            | 14                   | not in FOV <sup>†</sup> | not in FOV <sup>†</sup> | 882 <sup>a</sup> | Lactate     |
| S0016                        | 45                            | 25                   | 10                      | 387                     | 587 <sup>a</sup> | Lactate     |
| S0017                        | 68                            | 26                   | 8                       | 378                     | -                | Lactate     |
| S0019                        | 62                            | 26                   | 9                       | 339                     | -                | Lactate     |
| Mean±SD freebase             | 74.7±21.2                     | 27.8±3.1             | 8.0±1.1                 | 337.5±158.0             | 494.1±20.1       |             |
| Mean±SD lactate              | 60.3±7.7                      | 24.3±5.4             | 8.9±0.9                 | 401.4±60.7              | 734.2±147.6      |             |
| Mean±SD both formulations    | 67.5±17.5                     | 26.1±4.7             | 8.4±1.2                 | 365.9±128.5             | 614.1±159.7      |             |
| Lung scan                    | Prim_sec_bronchi              | Trachea <i>lung</i>  | Oesophagus <i>lung</i>  | Deep lung               | lung             | Formulation |
| S0001                        | 46                            | 29                   | 22                      | 11                      | 3053             | Freebase    |
| S0002                        | no scan                       | no scan              | no scan                 | no scan                 | no scan          | Freebase    |
| S0006                        | 56                            | 28                   | 25                      | 11                      | 2983             | Freebase    |
| S0009                        | 80                            | 47                   | 25                      | 11                      | 3043             | Freebase    |
| S0012                        | 64                            | 30                   | 6*                      | 9                       | 3033             | Freebase    |
| S0027                        | 29                            | 31                   | 27                      | 11                      | 3251             | Freebase    |
| S0013                        | 22*                           | 30                   | 8*                      | 12                      | 3563             | Lactate     |
| S0015                        | 28*                           | 51                   | 28                      | 12                      | 4392             | Lactate     |
| S0016                        | 39                            | 27                   | 23                      | 9                       | 1880             | Lactate     |
| S0017                        | No visual uptake <sup>‡</sup> | 31                   | 24                      | 11                      | 2893             | Lactate     |
| S0019                        | 19*                           | 23                   | 16*                     | 11                      | 2414             | Lactate     |
| Mean±SD freebase             | 53.5±17.0                     | 33.0±7.0             | 24.9±1.7                | 10.3±0.7                | 3072.5±92.4      |             |
| Mean±SD lactate <sup>1</sup> | 39                            | 32.1±10.0            | 24.9±2.3                | 11.0±1.3                | 3028.4±878.3     |             |

|                                        |           |          |          |          |              |
|----------------------------------------|-----------|----------|----------|----------|--------------|
| Mean±SD both formulations <sup>1</sup> | 52.5±16.7 | 32.6±8.6 | 24.9±2.0 | 10.6±1.1 | 3050.4±624.9 |
|----------------------------------------|-----------|----------|----------|----------|--------------|

\*Partial; The uptake of tracer was not covering the entire structure, VOI delineated where uptake was seen

†Not in within the field of view, the subject had a long neck hence, esophagus and upper lung was not covered by scan.

<sup>a</sup>delineated in S0006, S0012 S0015 and S0016 only.

<sup>‡</sup>No visual uptake was observed in the primary and secondary bronchus, region not possible to delineate.

<sup>1</sup> Partial VOIs not included in mean±SD

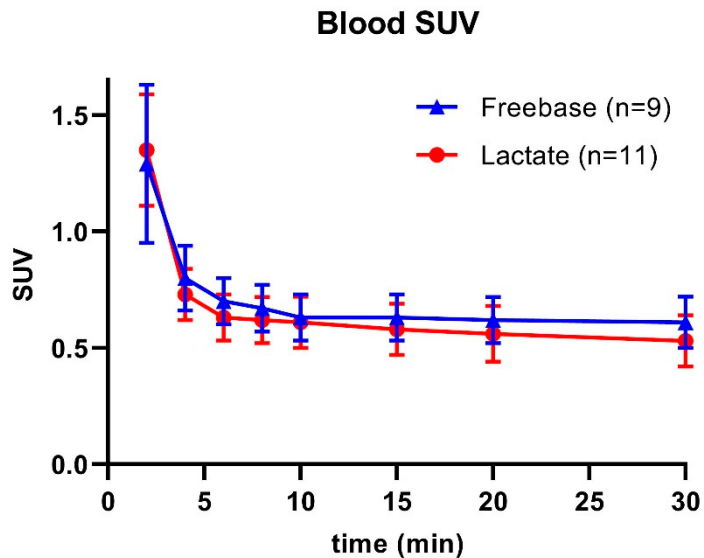

**Supplemental Figure S1:** Mean±SD of time activity measured in blood, [<sup>11</sup>C]nicotine freebase blue plots (triangles), and [<sup>11</sup>C]nicotine lactate red plots (circles). Number of samples (n=8-9) as specified in graph.

**Supplemental Table S2a: peak SUV and peak accumulation% (mean± SD) mouth scans**

| VOI peak SUV            | freebase (peak time sec) | lactate (peak time sec) | p value | n (freebase) | n (lactate) |
|-------------------------|--------------------------|-------------------------|---------|--------------|-------------|
| Oral cavity             | 88.7 ± 24.2 (165)        | 18.6 ± 18.6* (90)       | 0.0159  | 5            | 5           |
| Mouth trachea           | 19.1 ± 3.65 (110)        | 3.99 ± 5.41* (70)       | 0.0159  | 5            | 5           |
| Mouth oesophagus        | 27.8 ± 15.4 (1650)       | 9.46 ± 11.3 (210)       | 0.1111  | 5            | 4           |
| Mouth upper lung        | 6.88 ± 3.82 (25)         | 9.11 ± 2.20 (15)        | 0.5556  | 5            | 4           |
| VOI peak accumulation % |                          |                         |         |              |             |
| Oral cavity             | 9.26 ± 2.44 (165)        | 1.52 ± 1.39** (90)      | 0.0079  | 5            | 5           |
| Mouth trachea           | 0.78 ± 0.19 (110)        | 0.14 ± 0.17** (70)      | 0.0079  | 5            | 5           |
| Mouth oesophagus        | 0.31 ± 0.12 (165)        | 0.11 ± 0.12 (210)       | 0.0635  | 5            | 4           |
| Mouth upper lung        | 3.52 ± 2.38 (25)         | 5.49 ± 1.33 (15)        | 0.2857  | 5            | 4           |

Freebase vs lactate \*  $p \leq 0.05$  \*\*  $p \leq 0.01$ , Mann Whitney test (two-tailed)

**Supplemental Table S2b: peak SUV and peak accumulation% (mean± SD) lung scans**

| VOI peak SUV            | freebase (time sec) | lactate (sec)       | p value | n (freebase) | n (lactate) |
|-------------------------|---------------------|---------------------|---------|--------------|-------------|
| Prim sec bronchi        | 27.9 ± 5.34 (70)    | 8.29 ± 4.57* (15)   | 0.0286  | 4            | 4           |
| Lung trachea            | 17.8 ± 4.99 (45)    | 2.58 ± 2.51* (15)   | 0.0159  | 4            | 5           |
| Lung oesophagus         | 20.3 ± 9.47 (1650)  | 4.06 ± 1.51* (1350) | 0.0159  | 4            | 5           |
| Lung deep lung          | 6.95 ± 2.34 (25)    | 8.38 ± 8.42 (15)    | 0.7548  | 4            | 5           |
| Lung lung               | 8.38 ± 0.859 (35)   | 7.95 ± 4.39 (15)    | 0.5556  | 4            | 5           |
| VOI peak accumulation % |                     |                     |         |              |             |
| Prim sec bronchi†       | 1.98 ± 0.45 (45)    | 0.31 ± 0.18 (15) †  | †       | 4            | 4           |
| Lung trachea            | 0.79 ± 0.15 (45)    | 0.10 ± 0.06* (15)   | 0.0159  | 4            | 5           |
| Lung oesophagus†        | 0.73 ± 1.09 (70)    | 0.12 ± 0.10† (25)   | †       | 4            | 5           |
| Lung deep lung          | 0.10 ± 0.05 (35)    | 0.13 ± 0.11 (15)    | 0.9048  | 4            | 5           |
| Lung lung               | 35.5 ± 9.12 (35)    | 31.0 ± 9.62 (15)    | 0.4127  | 4            | 5           |

Freebase vs lactate \*  $p \leq 0.05$ , Mann Whitney test (two-tailed)

† The regions were partially delineated for some of the subjects, see and supplementary table 1, and detailed description of lung region VOIs in supplemental information Mann-Whitney test not done comparison and not relevant between fully delineated and partly delineated regions.

**Supplemental Table S2c: peak SUV and peak accumulation% (mean± SD) brain regions**

| VOI peak SUV            | freebase (time sec) | lactate (time sec) | n (freebase) | n (lactate) |
|-------------------------|---------------------|--------------------|--------------|-------------|
| Whole brain             | 1.77 (750)          | 2.27 (270)         | 1            | 1           |
| Inferior part of brain  | 2.05 ± 0.46 (750)   | 2.43 ± 0.34 (165)  | 3            | 3           |
| VOI peak accumulation % |                     |                    |              |             |
| Whole brain             | 4.50 (750)          | 5.14 (270)         | 1            | 1           |
| Inferior part of brain  | 1.43 ± 0.20 (750)   | 2.03 ± 0.42 (165)  | 3            | 3           |
|                         |                     |                    |              |             |

**Supplemental Table S3a:** AUC mouth scans (mean± SD)

| VOI SUV (AUC x1000)             | freebase     | lactate        |          | n (freebase) | n (lactate) |
|---------------------------------|--------------|----------------|----------|--------------|-------------|
| Oral cavity                     | 125.6 ± 35.9 | 20.62 ± 17.1** | p=0.0079 | 5            | 5           |
| Mouth trachea                   | 28.6 ± 4.23  | 5.24 ± 7.33**  | p=0.0079 | 5            | 5           |
| Mouth oesophagus                | 56.1 ± 20.4  | 14.9 ± 16.3*   | p=0.0159 | 5            | 4           |
| Mouth upper lung                | 4.43 ± 2.21  | 3.12 ± 1.62    | p=0.4127 | 5            | 4           |
| VOI accumulation % (AUC x 1000) |              |                |          |              |             |
| Mouth oral cavity               | 13.1 ± 3.64  | 1.21 ± 0.20**  | p=0.0079 | 5            | 5           |
| Mouth trachea                   | 1.18 ± 0.29  | 0.18 ± 0.23**  | p=0.0079 | 5            | 5           |
| Mouth oesophagus                | 0.62 ± 0.13  | 0.18 ± 0.17*   | p=0.0159 | 5            | 4           |
| Mouth upper lung                | 2.28 ± 1.61  | 1.80 ± 0.58    | p=0.7302 | 5            | 4           |

Freebase vs lactate \* p ≤ 0.05, \*\*p ≤ 0.01 Mann Whitney test (two-tailed)

**Supplemental Table S3b:** AUC lung scans (mean± SD)

| VOI SUV (AUC x 1000)            | freebase    | lactate      | p value | n (freebase) | n (lactate) |
|---------------------------------|-------------|--------------|---------|--------------|-------------|
| Prim sec bronchi                | 43.4 ± 11.4 | 8.85 ± 1.80* | 0.0286  | 4            | 4           |
| Lung trachea                    | 26.2 ± 12.5 | 2.84 ± 2.12* | 0.0159  | 4            | 5           |
| Lung oesophagus                 | 37.7 ± 25.0 | 7.85 ± 3.05* | 0.0159  | 4            | 5           |
| Lung deep lung                  | 3.16 ± 2.09 | 2.16 ± 1.32  | 0.2857  | 4            | 5           |
| Lung lung                       | 5.43 ± 1.52 | 2.73 ± 1.13* | 0.0317  | 4            | 5           |
| VOI accumulation % (AUC x 1000) |             |              |         |              |             |
| Prim sec bronchi†               | 3.20 ± 0.97 | 0.36 ± 0.21  | - †     | 4            | 4           |
| Lung trachea                    | 1.15 ± 0.40 | 0.12 ± 0.08* | 0.0159  | 4            | 5           |
| Lung oesophagus†                | 1.25 ± 1.32 | 0.24 ± 0.15  | - †     | 4            | 5           |
| Lung deep lung                  | 0.04 ± 0.04 | 0.03 ± 0.02  | 0.5556  | 4            | 5           |
| Lung lung                       | 23.2 ± 9.61 | 11.1 ± 2.77* | 0.0159  | 4            | 5           |

Freebase vs lactate \* p ≤ 0.05, Mann Whitney test (two-tailed)

†The regions were partially delineated for some of the subjects, see and supplementary table 1, and detailed description of lung region VOIs in supplemental information. Mann-Whitney test not done comparison not relevant between fully delineated and partly delineated regions.

**Supplemental Table S3c:** AUC brain scans regions (mean± SD)

| VOI SUV (AUC x 1000)     | freebase    | lactate     | n (freebase) | n (lactate) |
|--------------------------|-------------|-------------|--------------|-------------|
| Whole brain              | 2.53        | 2.96        | 1            | 1           |
| Inferior part of brain   | 3.70 ± 1.15 | 3.57 ± 0.42 | 3            | 3           |
| VOI accumulation % (AUC) |             |             |              |             |
| Whole brain              | 6.43        | 6.72        | 1            | 1           |
| Inferior part of brain   | 2.58 ± 0.57 | 3.03 ± 0.87 | 3            | 3           |
|                          |             |             |              |             |

**Supplemental Table S4:** Study population

| Subject | Part of study | Formulation                                    | Sex    | Age (years) | Body weight (kg) |
|---------|---------------|------------------------------------------------|--------|-------------|------------------|
| 001     | A             | [ <sup>11</sup> C]nicotine <sub>freebase</sub> | Male   | 63          | 85               |
| 009     | A             | [ <sup>11</sup> C]nicotine <sub>freebase</sub> | Male   | 61          | 94               |
| 002     | A             | [ <sup>11</sup> C]nicotine <sub>freebase</sub> | Female | 62          | 51               |
| 006     | A             | [ <sup>11</sup> C]nicotine <sub>freebase</sub> | Female | 57          | 74               |
| 012     | A             | [ <sup>11</sup> C]nicotine <sub>freebase</sub> | Female | 56          | 68               |
| 027     | A             | [ <sup>11</sup> C]nicotine <sub>freebase</sub> | Female | 59          | 63               |
| 010     | B             | [ <sup>11</sup> C]nicotine <sub>freebase</sub> | Female | 64          | 60               |
| 011     | B             | [ <sup>11</sup> C]nicotine <sub>freebase</sub> | Female | 55          | 75               |
| 028     | B             | [ <sup>11</sup> C]nicotine <sub>freebase</sub> | Female | 65          | 64               |
|         |               |                                                |        |             |                  |
| 015     | A             | [ <sup>11</sup> C]nicotine <sub>lactate</sub>  | Male   | 55          | 82               |
| 013     | A             | [ <sup>11</sup> C]nicotine <sub>lactate</sub>  | Female | 56          | 58               |
| 016     | A             | [ <sup>11</sup> C]nicotine <sub>lactate</sub>  | Female | 51          | 63               |
| 017     | A             | [ <sup>11</sup> C]nicotine <sub>lactate</sub>  | Female | 58          | 65               |
| 019     | A             | [ <sup>11</sup> C]nicotine <sub>lactate</sub>  | Female | 51          | 80               |
| 026     | B             | [ <sup>11</sup> C]nicotine <sub>lactate</sub>  | Female | 54          | 64               |
